# Supplementary material for: Mycobacterium tuberculosis Type II Toxin-Antitoxin Systems: Genetic Polymorphisms and Functional Properties and the Possibility of Their Use for Genotyping
Source: PubMed Central journal article supplement (PMC4680722; doi:10.1371/journal.pone.0143682), 2015-12-14
Supplement: pone.0143682.s002.pdf [file pone.0143682.s002.pdf]

**S2 Table. Primers for cloning of toxin genes used in this study.**

| <b>Locus tag</b> | <b>Gene</b>    | <b>Primer</b> | <b>Sequence (5'- 3')</b>   | <b>Product size (bp)</b> | <b>Reference</b> |
|------------------|----------------|---------------|----------------------------|--------------------------|------------------|
| <b>Rv2103c</b>   | <i>vapC37</i>  | Rv2103cN      | GGACGAAGAGCTTGTGCGCCGTCA   | 181                      | This study       |
|                  |                | Rv2103cC      | CAACAACGGCACCCAGGCGAACCC   |                          | This study       |
| <b>Rv1956</b>    | <i>higA1</i>   | Rv1956-N      | CTGCGGCTGGTGCTCGAAGTTCCCA  | 213                      | This study       |
|                  |                | Rv1956-C      | CGCGTTGCAGGTCAAGGTCGTC     |                          | This study       |
| <b>Rv2494</b>    | <i>vapC38</i>  | Rv2494-N1     | GATCCGCGAGTGGTTTACCGCAA    | 194                      | This study       |
|                  |                | Rv2494-C1     | ACGAGCGATACGTCGTCAGCCAG    |                          | This study       |
| <b>Rv1397c</b>   | <i>vapC10</i>  | Rv1397cdir    | CGTGTGGCATTTCCTCATGTTTCGAG | 192                      | This study       |
|                  |                | Rv1397crev    | AGGAGTGCGGTCTTATTGCAAC     |                          | This study       |
|                  |                | Rv1397cN      | AACCGGATTGGACTTGCGGACTA    | 244                      | This study       |
|                  |                | Rv1397cC      | CTTTGTTTATTAATGTCGCGCGGCC  |                          | This study       |
| <b>Rv2274c</b>   | <i>mazF8</i>   | Rv2274cN      | CGGTGTTGAGGTCAGTGATCAGGGT  | 138                      | This study       |
|                  |                | Rv2274cC      | GTGAGTGTACCCGCCGCCACAG     |                          | This study       |
| <b>Rv3408</b>    | <i>vapC47</i>  | Rv3408N       | GACACCTCGGCCCTGACTAAGCTG   | 225                      | This study       |
|                  |                | Rv3408C       | GATCACCGGTTCCGGTGAGCGGA    |                          | This study       |
| <b>Rv1102c</b>   | <i>mazF3</i>   | mazF3N        | TGACAAGGCTAGACCCGTCCTGAT   | 218                      | This study       |
|                  |                | mazFC         | CGAGCAGGTAGCCGATTTGACGA    |                          | This study       |
| <b>Rv1720c</b>   | <i>vapC12</i>  | Rv1720cdir    | GCGCAGCCGAGCTTGTTGACGAGG   | 246                      | This study       |
|                  |                | Rv1720crev    | ACGGGCAGGCTAAGGAAGTTCACA   |                          | This study       |
| <b>Rv0656c</b>   | <i>vapC6</i>   | Rv0656c-N     | GTGCCCTGTCGGTTGTCGATCTGCT  | 192                      | This study       |
|                  |                | Rv0656c- C    | ATCAGCCATGCGTGTCTCCTTGTC   |                          | This study       |
|                  |                | Rv0656cNb     | GAGTTCGACCAGATGAGCCGGATG   | 194                      | This study       |
|                  |                | Rv0656cCb     | GCATCGTTCGTGGAGGACTACTAGG  |                          | This study       |
| <b>Rv2526</b>    | <i>vapB17</i>  | Rv2526-N1     | TCGTCGACCATCTCGCGCACG      | 194                      | This study       |
|                  |                | Rv2526-C1     | AATACAGCCATTCAAGTTCGCCGAT  |                          | This study       |
| <b>Rv0624</b>    | <i>vapC30</i>  | 06241N        | AGACGTTGACCGAGGCAGTGGTTA   | 375                      | This study       |
|                  |                | 06241C        | CGATGAAGCCACAGATCCAGCTCA   |                          | This study       |
| <b>Rv0549c</b>   | <i>vapC3</i>   | 05492N        | GACGAAAGACCGTGTGAGTCACC    | 382                      | This study       |
|                  |                | 05492C        | GAGTTGGAGAACTCCGCAACCGAT   |                          | This study       |
| <b>Rv2653c</b>   | <i>rv2653c</i> | NovelN        | ACCGTCGATCACATCATTTCCAGG   | 255                      | This study       |

|                                 |               |           |                                           |   |            |
|---------------------------------|---------------|-----------|-------------------------------------------|---|------------|
|                                 |               | NovelC    | TTCGGCTGTGTCGTCGTCGATTTC                  |   | This study |
| <b>Probes for Real-Time PCR</b> |               |           |                                           |   |            |
| <b>Rv1397c</b>                  | <i>vapC10</i> | Rv1397U   | (HEX)- 5'-GCACCGACCGTGGGCATGACA-3'-(BHQ2) | - | This study |
|                                 |               | Rv1397nU  | (FAM)- 5'-CACCGACCGCGGGCATGACA-3'-(RTQ1)  |   | This study |
| <b>Rv1720c</b>                  | <i>vapC12</i> | Rv1720cW  | (FAM)- 5'-GAAACCGTGCACGCCCTGCA-3'-(RTQ1)  | - | This study |
|                                 |               | Rv1720cnW | (HEX)- 5'-GAAACCGTGC GCGCCCTGCA-3'-(BHQ2) |   | This study |
| <b>Rv1956</b>                   | <i>higA1</i>  | Rv1956nB  | (FAM)- 5'-CACGGGACCACCAGGTCCGGG3'-(RTQ1)  | - | This study |
|                                 |               | Rv1956B   | (HEX)- 5'-CACGGGACCATCAGGTCCGGG3'-(BHQ2)  |   | This study |
| <b>Rv2494</b>                   | <i>vapC38</i> | Rv2494nB  | (FAM)- 5'-TTCGTGCGGGTGTGACGAA-3'-(RTQ1)   | - | This study |
|                                 |               | Rv2494B   | (HEX)- 5'-TTCGTGCGGGCGTGCACGAA-3'-(BHQ2)  |   | This study |
| <b>Rv2103c</b>                  | <i>vapC37</i> | Rv2103nB  | (FAM)- 5'-CGTGAACACCACAAGTGAGCA3'-(RTQ1)  | - | This study |
|                                 |               | Rv2103B   | (HEX)- 5'-CGTGAACACCGCAAGTGAGCA3'-(BHQ2)  |   | This study |
| <b>Rv1102c</b>                  | <i>mazF3</i>  | mazF3EAL  | (FAM)- 5'-TGCGACAACCCAAACGA-3'-(RTQ1)     | - | This study |
|                                 |               | mazF3nEAL | (HEX)- 5'-TGCGACAACATCCAAACGA3'-(BHQ2)    |   | This study |
