# Supplementary material for: Mycobacterium tuberculosis Type II Toxin-Antitoxin Systems: Genetic Polymorphisms and Functional Properties and the Possibility of Their Use for Genotyping
Source: PubMed Central journal article supplement (PMC4680722; doi:10.1371/journal.pone.0143682), 2015-12-14
Supplement: pone.0143682.s003.pdf [file pone.0143682.s003.pdf]

**S3 Table. Type II toxin-antitoxin systems of *M. tuberculosis* discussed in this article.**

| №  | Family          | Toxin-antitoxin system      | Toxin       | Antitoxin | Functions                                                                                  |
|----|-----------------|-----------------------------|-------------|-----------|--------------------------------------------------------------------------------------------|
|    |                 |                             | (locus_tag) |           |                                                                                            |
| 1  | ND <sup>1</sup> | Novel                       | rv1546      | rv1545    | Not inhibit the growth of <i>M. smegmatis</i> <sup>6</sup>                                 |
| 2  |                 |                             | rv2653c     | rv2654c   | Inhibit the growth of <i>M. smegmatis</i> <sup>6</sup>                                     |
| 3  |                 |                             | rv0910      | rv0909    | Inhibit the growth of <i>M. smegmatis</i> , but the mechanism is unknown <sup>6</sup>      |
| 4  | MazEF           | mazEF1                      | rv0456A     | rv0456B   | Not inhibit the growth of <i>M. smegmatis</i> <sup>6</sup>                                 |
| 5  |                 | mazEF2                      | rv0659c     | rv0660c   |                                                                                            |
| 6  |                 | mazEF3                      | rv1102c     | rv1103c   | Inhibit the growth of <i>M. smegmatis</i> <sup>6</sup>                                     |
| 7  |                 | mazEF4                      | rv1495      | rv1494    | Not inhibit the growth of <i>M. smegmatis</i> <sup>6</sup>                                 |
| 8  |                 | mazEF5                      | rv1942c     | rv1943c   | Inhibit the growth of <i>M. smegmatis</i> <sup>6</sup>                                     |
| 9  |                 | mazEF6                      | rv1991c     | rv1991A   |                                                                                            |
| 10 |                 | mazEF7                      | rv2063A     | rv2063    |                                                                                            |
| 11 |                 | mazEF8                      | rv2274c     | rv2274A   | Not tested                                                                                 |
| 12 |                 | mazEF9                      | rv2801c     | rv2801A   | Inhibit the growth of <i>M. smegmatis</i> <sup>6</sup>                                     |
| 13 |                 | mazEF10 <sup>2</sup>        | rv0299      | rv0298    |                                                                                            |
| 14 | RelBE           | relBE1                      | rv1246c     | rv1247c   |                                                                                            |
| 15 |                 | relFG (relBE2)              | rv2866      | rv2865    |                                                                                            |
| 16 |                 | relJK (relBE3) <sup>3</sup> | rv3358      | rv3357    | Inhibit the growth of <i>M. smegmatis</i> <sup>4</sup>                                     |
| 17 | ParDE           | parDE1                      | rv1959c     | rv1960c   | Not inhibit the growth of <i>M. smegmatis</i> <sup>6</sup>                                 |
| 18 |                 | parDE2                      | rv2142c     | rv2142A   | Not tested for <i>M. smegmatis</i> , but inhibit the growth of <i>E. coli</i> <sup>4</sup> |
| 19 | HigAB           | higAB1                      | rv1955      | rv1956    | Inhibit the growth <i>M. smegmatis</i> , expression in hypoxic conditions <sup>6</sup>     |
| 20 |                 | higAB2 <sup>2</sup>         | rv2022c     | rv2021c   | Not tested                                                                                 |
| 21 |                 | higAB3 <sup>2</sup>         | rv3182      | rv3183    | Not inhibit the growth of <i>M. smegmatis</i> <sup>4</sup>                                 |
| 22 | VapBC           | vapBC1 <sup>2</sup>         | rv0065      | rv0064A   |                                                                                            |

|    |  |         |         |          |                                                                                                                                                                                                 |
|----|--|---------|---------|----------|-------------------------------------------------------------------------------------------------------------------------------------------------------------------------------------------------|
| 23 |  | vapBC2  | rv0301  | rv0300   | Inhibit the growth of <i>M. smegmatis</i> , by disrupting translation due to destruction of RNA <sup>6</sup>                                                                                    |
| 24 |  | vapBC3  | rv0549c | rv0550c  | Inhibit the growth of <i>M. smegmatis</i> ; induction in macrophages; induced by hypoxia <sup>6</sup> , SDS stress <sup>7</sup> , during adaptation to nutrient starvation <sup>12</sup>        |
| 25 |  | vapBC4  | rv0595c | rv0596c  | Not inhibit the growth of <i>M. smegmatis</i> <sup>6</sup> ; induced during adaptation to nutrient starvation <sup>12</sup> , macrophage infection <sup>11</sup> and by SDS stress <sup>7</sup> |
| 26 |  | vapBC5  | rv0627  | rv0626   | Not inhibit the growth of <i>M. smegmatis</i> <sup>6</sup> or <i>E. coli</i> <sup>13</sup> , but inhibit the growth of <i>M. tuberculosis</i> ; toxin has RNase activity <sup>14</sup>          |
| 27 |  | vapBC6  | rv0656c | rv0657c, | Not inhibit the growth of <i>M. smegmatis</i> <sup>6</sup>                                                                                                                                      |
| 28 |  | vapBC7  | rv0661c | rv0662c  |                                                                                                                                                                                                 |
| 29 |  | vapBC8  | rv0665  | rv0664   |                                                                                                                                                                                                 |
| 30 |  | vapBC9  | rv0960  | rv0959A  |                                                                                                                                                                                                 |
| 31 |  | vapBC10 | rv1397c | rv1398c  | Inhibit the growth of <i>M. smegmatis</i> <sup>6</sup>                                                                                                                                          |
| 32 |  | vapBC11 | rv1561  | rv1560   | Inhibit the growth of <i>M. smegmatis</i> , by disrupting translation due to destruction of RNA; induction in macrophages <sup>6</sup>                                                          |
| 33 |  | vapBC12 | rv1720c | rv1721c  | Not inhibit the growth of <i>M. smegmatis</i> <sup>6</sup>                                                                                                                                      |
| 34 |  | vapBC13 | rv1838c | rv1839c  | Inhibit the growth of <i>M. smegmatis</i> <sup>6</sup>                                                                                                                                          |
| 35 |  | vapBC14 | rv1953  | rv1952   | Not inhibit the growth of <i>M. smegmatis</i> <sup>6</sup>                                                                                                                                      |
| 36 |  | vapBC15 | rv2010  | rv2009   | Inhibit the growth <i>M. smegmatis</i> , expression in hypoxic conditions <sup>6</sup> , but repressed during nutrient starvation <sup>8</sup> , adaptation to hypoxia <sup>9</sup> .           |
| 37 |  | vapBC16 | rv2231A | rv2231B  | Not inhibit the growth of <i>M. smegmatis</i> <sup>6</sup>                                                                                                                                      |
| 38 |  | vapBC17 | rv2527  | rv2526   |                                                                                                                                                                                                 |
| 39 |  | vapBC18 | rv2546  | rv2545   |                                                                                                                                                                                                 |
| 40 |  | vapBC19 | rv2548  | rv2547   |                                                                                                                                                                                                 |

|    |         |         |         |                                                                                                                                                                                                                  |
|----|---------|---------|---------|------------------------------------------------------------------------------------------------------------------------------------------------------------------------------------------------------------------|
|    |         |         |         | in sputum <sup>15</sup>                                                                                                                                                                                          |
| 41 | vapBC20 | rv2549c | rv2550c | Not inhibit the growth of <i>M. smegmatis</i> <sup>6</sup> ; induced during macrophage infection <sup>11</sup>                                                                                                   |
| 42 | vapBC21 | rv2757c | rv2758c | Inhibit the growth of <i>M. smegmatis</i> <sup>6</sup>                                                                                                                                                           |
| 43 | vapBC22 | rv2829c | rv2830c | Inhibit the growth of <i>M. smegmatis</i> , by disrupting translation due to destruction of RNA <sup>6</sup> ; induced during macrophage infection, hypoxia <sup>6,9</sup> and nutrient starvation <sup>12</sup> |
| 44 | vapBC23 | rv2863  | rv2862A | Not inhibit the growth of <i>M. smegmatis</i> <sup>6</sup>                                                                                                                                                       |
| 45 | vapBC24 | rv0240  | rv0239  |                                                                                                                                                                                                                  |
| 46 | vapBC25 | rv0277c | rv0277A | Inhibit the growth of <i>M. smegmatis</i> <sup>6</sup>                                                                                                                                                           |
| 47 | vapBC26 | rv0582  | rv0581  |                                                                                                                                                                                                                  |
| 48 | vapBC27 | rv0598c | rv0599c | Not inhibit the growth of <i>M. smegmatis</i> <sup>6</sup>                                                                                                                                                       |
| 49 | vapBC28 | rv0609  | rv0608  | Inhibit the growth of <i>M. smegmatis</i> <sup>6</sup>                                                                                                                                                           |
| 50 | vapBC29 | rv0617  | rv0616A | Not inhibit the growth of <i>M. smegmatis</i> <sup>6</sup>                                                                                                                                                       |
| 51 | vapBC30 | rv0624  | rv0623  | Inhibit the growth of <i>M. smegmatis</i> <sup>6</sup>                                                                                                                                                           |
| 52 | vapBC31 | rv0749  | rv0748  |                                                                                                                                                                                                                  |
| 53 | vapBC32 | rv1114  | rv1113  |                                                                                                                                                                                                                  |
| 54 | vapBC33 | rv1242  | rv1241  |                                                                                                                                                                                                                  |
| 55 | vapBC34 | rv1741  | rv1740  | Not inhibit the growth of <i>M. smegmatis</i> <sup>6</sup>                                                                                                                                                       |
| 56 | vapBC35 | rv1962c | rv1962A | Inhibit the growth of <i>M. smegmatis</i> <sup>6</sup>                                                                                                                                                           |
| 57 | vapBC36 | rv1982c | rv1982A | Not inhibit the growth of <i>M. smegmatis</i> <sup>6</sup>                                                                                                                                                       |
| 58 | vapBC37 | rv2103c | rv2104c | Inhibit the growth of <i>M. smegmatis</i> <sup>6</sup> ; involved in the regulation of the growth rate (slowing) <i>M. bovis</i> under stressful conditions <sup>5</sup>                                         |
| 59 | vapBC38 | rv2494  | rv2493  | Not inhibit the growth of <i>M. smegmatis</i> <sup>6</sup> , but involved in the regulation of the growth rate (slowing) <i>M. bovis</i> under stressful conditions <sup>5</sup>                                 |
| 60 | vapBC39 | rv2530c | rv2530A | Inhibit the growth of <i>M. smegmatis</i> <sup>6</sup>                                                                                                                                                           |

|           |  |                      |         |         |                                                                                                                                         |
|-----------|--|----------------------|---------|---------|-----------------------------------------------------------------------------------------------------------------------------------------|
| <b>61</b> |  | vapBC40              | rv2596  | rv2595  | Not inhibit the growth of <i>M. smegmatis</i> <sup>6</sup>                                                                              |
| <b>62</b> |  | vapBC41              | rv2602  | rv2601A | Inhibit the growth of <i>M. smegmatis</i> <sup>6</sup>                                                                                  |
| <b>63</b> |  | vapBC42              | rv2759c | rv2760c | Not inhibit the growth of <i>M. smegmatis</i> <sup>6</sup>                                                                              |
| <b>64</b> |  | vapBC43              | rv2872  | rv2871  | Inhibit the growth of <i>M. smegmatis</i> <sup>6</sup>                                                                                  |
| <b>65</b> |  | vapBC44              | rv3320c | rv3321c | Not inhibit the growth of <i>M. smegmatis</i> <sup>6</sup> ; repressed during hypoxia <sup>9</sup> and nutrient starvation <sup>8</sup> |
| <b>66</b> |  | vapBC45 <sup>2</sup> | rv2019  | rv2018  | Not tested                                                                                                                              |
| <b>67</b> |  | vapBC46              | rv3384c | rv3385c | Inhibit the growth of <i>M. smegmatis</i> <sup>6</sup>                                                                                  |
| <b>68</b> |  | vapBC47              | rv3408  | rv3407  | Inhibit the growth of <i>M. smegmatis</i> , by disrupting translation due to destruction of RNA <sup>6</sup>                            |
| <b>69</b> |  | vapBC48              | rv3697c | rv3697A | Not tested                                                                                                                              |
| <b>70</b> |  | vapBC49 <sup>2</sup> | rv3180c | rv3181c |                                                                                                                                         |
| <b>71</b> |  | vapBC50 <sup>2</sup> | rv3749c | rv3750c |                                                                                                                                         |

<sup>1</sup>ND = not determined

<sup>2</sup>These systems are described and annotated by Sala et al. in 2014 [1].

<sup>3</sup>Annotation of this system at the GenBank (sequences database, NCBI) looks like a relBE3, but Sala P. [1] proposed to call it YefM/YoeB.

<sup>4</sup> According to Sala P. et al [1].

<sup>5</sup> According Beste DJ et al. [2].

<sup>6</sup> According Ramage HR et al. [3].

<sup>7</sup> According Manganelli R et al. [4].

<sup>8</sup> According Betts JC et al. [5].

<sup>9</sup> According Sherman DR et al. [6].

<sup>10</sup> According Muttucumaru DG et al. [7].

<sup>11</sup> According Stewart GR et al. [8].

<sup>12</sup> According Hampshire T et al. [9].

<sup>13</sup> According Gupta A et al. [10].

<sup>14</sup> According Miallau L et al. [11].

<sup>15</sup> According Garton NJ et al. [12].

## References:

1. Sala A, Bordes P, Genevaux P. Multiple toxin-antitoxin systems in *Mycobacterium tuberculosis*. *Toxins* (Basel). 2014 Mar; 6(3):1002-20. doi: 10.3390/toxins6031002.
2. Beste DJ, Espasa M, Bonde B, Kierzek AM, Stewart GR, McFadden J. The genetic requirements for fast and slow growth in mycobacteria. *PLoS One*. 2009 Apr; 4(4):e5349. doi: 10.1371/journal.pone.0005349.
3. Ramage HR, Connolly LE, Cox JS. Comprehensive functional analysis of *Mycobacterium tuberculosis* toxin-antitoxin systems: implications for pathogenesis, stress responses, and evolution. *PLoS Genet*. 2009 Dec; 5(12):e1000767. doi: 10.1371/journal.pgen.1000767.
4. Manganelli R, Voskuil MI, Schoolnik GK, Smith I. *Mycobacterium tuberculosis* ECF sigma factor sigmaE: role in global gene expression and survival in macrophages. *Mol Microbiol*. 2001 Jul; 41(2):423-37. doi: 10.1046/j.1365-2958.2001.02525.x.
5. Betts JC, Lukey PT, Robb LC, McAdam RA, Duncan K. Evaluation of a nutrient starvation model of *Mycobacterium tuberculosis* persistence by gene and protein expression profiling. *Mol Microbiol*. 2002 Feb; 43(3):717-31. doi: 10.1046/j.1365-2958.2002.02779.x.
6. Sherman DR, Voskuil M, Schnappinger D, Liao R, Harrell MI, Schoolnik GK. Regulation of the *Mycobacterium tuberculosis* hypoxic response gene encoding alpha-crystallin. *Proc Natl Acad Sci USA*. 2001 Jun; 98: 7534-7539. doi: 10.1073/pnas.121172498.
7. Muttucumaru DG, Roberts G, Hinds J, Stabler RA, Parish T. Gene expression profile of *Mycobacterium tuberculosis* in a non-replicating state. *Tuberculosis (Edinb)*. 2004; 84(3-4): 239-246. doi: <http://dx.doi.org/10.1016/j.tube.2003.12.006>.
8. Stewart GR, Patel J, Robertson BD, Rae A, Young DB. Mycobacterial mutants with defective control of phagosomal acidification. *PLoS Pathog*. 2005 Nov; 1(3): 269-278. doi: 10.1371/journal.ppat.0010033.
9. Hampshire T, Soneji S, Bacon J, James BW, Hinds J, Laing K, et al. Stationary phase gene expression of *Mycobacterium tuberculosis* following a progressive nutrient depletion: a model for persistent organisms? *Tuberculosis (Edinb)*. 2004; 84(3-4):228-38. doi: 10.1016/j.tube.2003.12.010.
10. Gupta A. Killing activity and rescue function of genome-wide toxin-antitoxin loci of *Mycobacterium tuberculosis*. *FEMS Microbiol Lett*. 2009 Jan; 290(1):45-53. doi: 10.1111/j.1574-6968.2008.01400.x.
11. Miallau L, Faller M, Chiang J, Arbing M, Guo F, Cascio D, et al. Structure and proposed activity of a member of the VapBC family of toxin-antitoxin systems. VapBC-5 from *Mycobacterium tuberculosis*. *J Biol Chem*. 2009 Jan; 284(1):276-83. doi: 10.1074/jbc.M805061200.
12. Garton NJ, Waddell SJ, Sherratt AL, Lee SM, Smith RJ, Senner C, et al. Cytological and transcript analyses reveal fat and lazy persister-like bacilli in tuberculous sputum. *PLoS Med*. 2008 Apr ; 5(4):e75. doi: 10.1371/journal.pmed.0050075.
