# Supplementary material for: Mycobacterium tuberculosis Type II Toxin-Antitoxin Systems: Genetic Polymorphisms and Functional Properties and the Possibility of Their Use for Genotyping
Source: PubMed Central journal article supplement (PMC4680722; doi:10.1371/journal.pone.0143682), 2015-12-14
Supplement: pone.0143682.s004.pdf [file pone.0143682.s004.pdf]

**S4 Table. Genomes of *M. tuberculosis* from the international database GenBank (NCBI) collected and investigated in this article.**

| <b>№</b>  | <b>Genotype</b>            | <b>Strains</b> | <b>Origin</b>                | <b>Accession number</b> | <b>Assembly level</b> |
|-----------|----------------------------|----------------|------------------------------|-------------------------|-----------------------|
| <b>1</b>  | <b>Beijing (Modern)</b>    | HN878          | USA                          | ADNF01000000            | Chromosome            |
| <b>2</b>  |                            | T85            | USA<br>(Chinese migrants)    | ABOW00000000            | Scaffold              |
| <b>3</b>  |                            | 210            | USA                          | ADAB00000000            | Contig                |
| <b>4</b>  |                            | CCDC5079       | China                        | CP001641                | Complete Genome       |
| <b>5</b>  |                            | X122           | Western Cape of South Africa | ADNG00000000            | Chromosome            |
| <b>6</b>  |                            | CCDC5180       | China                        | CP001642                | Complete Genome       |
| <b>7</b>  | <b>Beijing (Ancestral)</b> | R1207          | Western Cape of South Africa | ADNH00000000            | Chromosome            |
| <b>8</b>  |                            | CTRI-4         | Tomsk, Russia                | AIEE01000000            | Contig                |
| <b>9</b>  |                            | 02_1987        | USA<br>(ethnic, Korean)      | ABLM00000000            | Scaffold              |
| <b>10</b> |                            | 94_M4241A      | USA<br>(ethnic, Chinese)     | ABLL00000000            | Scaffold              |
| <b>11</b> | <b>Beijing</b>             | SP2            | Russia                       | SRX216884               | Reads                 |
| <b>12</b> |                            | SP3            |                              | SRX216885               |                       |
| <b>13</b> |                            | SP4            |                              | SRX216886               |                       |
| <b>14</b> |                            | SP5            |                              | SRX216887               |                       |
| <b>15</b> |                            | SP6            |                              | SRX216888               |                       |
| <b>16</b> |                            | SP8            |                              | SRX216890               |                       |
| <b>17</b> |                            | SP9            |                              | SRX216891               |                       |
| <b>18</b> |                            | SP11           |                              | SRX216893               |                       |
| <b>19</b> |                            | SP12           |                              | SRX216894               |                       |
| <b>20</b> |                            | SP16           |                              | SRX216896               |                       |
| <b>21</b> |                            | SP18           |                              | SRX216898               |                       |
| <b>22</b> |                            | SP29           |                              | SRX216904               |                       |
| <b>23</b> |                            | MOS10          |                              | SRX216917               |                       |
| <b>24</b> |                            | MOS12          |                              | SRX216919               |                       |
| <b>25</b> |                            | MOS14          |                              | SRX216920               |                       |
| <b>26</b> | XDR1221                    | China          | AJGN00000000                 | Contig                  |                       |
| <b>27</b> | XDR1219                    |                | AJGO00000000                 | Contig                  |                       |
| <b>28</b> | WX3                        |                | AJGL00000000                 | Contig                  |                       |
| <b>29</b> | WX1                        |                | AJGM00000000                 | Contig                  |                       |
| <b>30</b> | Beijing/ NITR203           |                | India                        | CP005082                | Complete              |

|    |            |                      |                                                            |              |                    |
|----|------------|----------------------|------------------------------------------------------------|--------------|--------------------|
|    |            |                      |                                                            |              | Genome             |
| 31 |            | PanR0606             | Panama                                                     | ATRX00000000 | Chromosome         |
| 32 |            | PanR0605             |                                                            | ATRW00000000 | Chromosome         |
| 33 |            | NCGM2209             | Japan                                                      | BADQ00000000 | Scaffold           |
| 34 |            | CWCFVRF<br>MDRTB 670 | India                                                      | JDVY00000000 | Contig             |
| 35 |            | HKBS1                | N/A (Beijing/<br>W Lineage)                                | CP002871     | Complete<br>Genome |
| 36 |            | G-12-005             | Georgia                                                    | JHUF00000000 | Contig             |
| 37 |            | BT2                  | N/A (Beijing/W)                                            | CP002882     | Complete<br>Genome |
| 38 |            | BT1                  | N/A (Beijing/W)                                            | CP002883     | Complete<br>Genome |
| 39 |            | 1034                 | China                                                      | APHO00000000 | Contig             |
| 40 |            | B0/W-148             | SP1                                                        | Russia       | SRX216883          |
| 41 | SP7        |                      | SRX216889                                                  |              |                    |
| 42 | SP10       |                      | SRX216892                                                  |              |                    |
| 43 | SP21       |                      | SRX216899                                                  |              |                    |
| 44 | SP13       |                      | SRX216895                                                  |              |                    |
| 45 | SP22       |                      | SRX216900                                                  |              |                    |
| 46 | MOS11      |                      | SRX216918                                                  |              |                    |
| 47 | W-148      |                      | ACSX00000000                                               | Scaffold     |                    |
| 48 | EAI        | EAS054               | USA<br>(Born in India)                                     | ABOV00000000 | Scaffold           |
| 49 |            | EAI5                 | India                                                      | CP006578     | Complete<br>Genome |
| 50 | Delhi/CAS  | OSDD518              | India                                                      | AHHZ00000000 | Contig             |
| 51 |            | OSDD504              |                                                            | AHHY00000000 | Contig             |
| 52 |            | OSDD071              |                                                            | AHHX00000000 | Contig             |
| 53 | EAI-Manila | T92                  | San Francisco from<br>a patient born in<br>The Philippines | ABLN00000000 | Scaffold           |
| 54 |            | T46                  | USA<br>(Born in<br>Philippines)                            | ACHO00000000 | Scaffold           |
| 55 |            | T17                  | ABQH00000000                                               | Scaffold     |                    |
| 56 |            | PR05                 | Malaysia                                                   | AOMG00000000 | Contig             |
| 57 |            | NA-A0008             | India                                                      | ALYG00000000 | Contig             |
| 58 |            | NA-A0009             | India                                                      | ALYH00000000 | Contig             |
| 59 |            | 43-16836             | Thailand                                                   | ATNF00000000 | Contig             |
| 60 | Haarlem    | Haarlem              | Netherlands                                                | AASN00000000 | Scaffold           |

|    |              |                          |                    |              |                      |
|----|--------------|--------------------------|--------------------|--------------|----------------------|
| 61 |              | str. Erdman = ATCC 35801 | N/A                | AP012340     | Complete Genome      |
| 62 |              | PanR0907                 | Panama             | ATSO00000000 | Chromosome           |
| 63 |              | PanR0902                 |                    | ATSK00000000 | Chromosome           |
| 64 |              | PanR0801                 |                    | ATSG00000000 | Chromosome           |
| 65 |              | PanR0206                 |                    | ATMN00000000 | Chromosome           |
| 66 |              | OSDD105                  |                    | India        | AUXD00000000         |
| 67 |              | 7199-99                  | Germany            | HE663067     | Complete Genome      |
| 68 | F15/LAM4/KZN | KZN-1435                 | KwaZulu-Natal      | CP001658     | Complete Genome      |
| 69 |              | KZN-V2475                |                    | ACVT00000000 | Chromosome           |
| 70 |              | KZN-R506                 |                    | ACVU00000000 | Chromosome           |
| 71 |              | KZN 605                  |                    | ABGN00000000 | Scaffold             |
| 72 |              | KZN-4207                 |                    | CP001662     | Complete Genome      |
| 73 | LAM          | UT205                    | Colombia           | HE608151     | Chromosome with gaps |
| 74 |              | MTB-476                  | Kazakhstan: Almaty | AZBA00000000 | Contig               |
| 75 |              | INS-XDR                  | Peru               | JANH00000000 | Contig               |
| 76 |              | INS-SEN                  |                    | JAQH00000000 | Contig               |
| 77 |              | INS-MDR                  |                    | JAQI00000000 | Contig               |
| 78 |              | GM 1503                  | Gambia             | ABQG00000000 | Scaffold             |
| 79 |              | 98-R604<br>INH-RIF-EM    | N/A                | ABVM00000000 | Scaffold             |
| 80 |              | PanR0203                 | Panama             | ATML00000000 | Chromosome           |
| 81 |              | PanR0602                 |                    | ATRT00000000 | Chromosome           |
| 82 |              | PanR0402                 |                    | ATEF00000000 | Chromosome           |
| 83 |              | LAM2                     | PanR0304           | Panama       | ATES00000000         |
| 84 | PanR0503     |                          | ATRQ00000000       |              | Chromosome           |
| 85 | PanR0409     |                          | ATEA00000000       |              | Chromosome           |
| 86 | PanR0903     |                          | ATSL00000000       |              | Chromosome           |
| 87 | PanR0404     |                          | ATED00000000       |              | Chromosome           |
| 88 | PanR0308     |                          | ATEO00000000       |              | Chromosome           |
| 89 | PanR0313     |                          | ATEL00000000       |              | Chromosome           |
| 90 | PanR0610     |                          | ATSA00000000       |              | Chromosome           |
| 91 | PanR0201     |                          | ANZG00000000       |              | Chromosome           |
| 92 | LAM4         | PanR1101                 | Panama             | ATSS00000000 | Chromosome           |

|            |          |              |            |              |            |
|------------|----------|--------------|------------|--------------|------------|
| <b>93</b>  |          | PanR1005     |            | ANZI00000000 | Chromosome |
| <b>94</b>  |          | PanR0403     |            | ATEE00000000 | Chromosome |
| <b>95</b>  | LAM1     | PanR0411     | Panama     | ATDY00000000 | Chromosome |
| <b>96</b>  |          | PanR0804     |            | ATSI00000000 | Chromosome |
| <b>97</b>  |          | PanR0407     |            | ATEB00000000 | Chromosome |
| <b>98</b>  |          | PanR0412     |            | ATDX00000000 | Chromosome |
| <b>99</b>  |          | PanR1006     |            | ATST00000000 | Chromosome |
| <b>100</b> |          | PanR0802     |            | ANZH00000000 | Chromosome |
| <b>101</b> |          | PanR0501     |            | ATRP00000000 | Chromosome |
| <b>102</b> |          | PanR0307     |            | ATEP00000000 | Chromosome |
| <b>103</b> |          | PanR0410     |            | ATDZ00000000 | Chromosome |
| <b>104</b> |          | PanR0317     |            | ATEH00000000 | Chromosome |
| <b>105</b> |          | PanR0311     |            | ATEM00000000 | Chromosome |
| <b>106</b> |          | PanR0904     |            | ATSM00000000 | Chromosome |
| <b>107</b> |          | PanR0803     |            | ATSH00000000 | Chromosome |
| <b>108</b> |          | PanR0609     |            | ATRZ00000000 | Chromosome |
| <b>109</b> |          | PanR0607     |            | ATRY00000000 | Chromosome |
| <b>110</b> |          | PanR0909     |            | ATSQ00000000 | Chromosome |
| <b>111</b> |          | PanR0601     |            | ATRS00000000 | Chromosome |
| <b>112</b> |          | PanR0314     |            | ATEK00000000 | Chromosome |
| <b>113</b> |          | PanR0207     |            | ATMQ00000000 | Chromosome |
| <b>114</b> |          | PanR0209     |            | ATMP00000000 | Chromosome |
| <b>115</b> |          | PanR0707     |            | ATSE00000000 | Chromosome |
| <b>116</b> | PanR0603 | ATRU00000000 | Chromosome |              |            |
| <b>117</b> | PanR0604 | ATRV00000000 | Chromosome |              |            |
| <b>118</b> | PanR0401 | ATEG00000000 | Chromosome |              |            |
| <b>119</b> | PanR0505 | ATRR00000000 | Chromosome |              |            |
| <b>120</b> | PanR0205 | ATMM00000000 | Chromosome |              |            |
| <b>121</b> | PanR0702 | ATSC00000000 | Chromosome |              |            |
| <b>122</b> | LAM3     | PanR0906     | Panama     | ATSN00000000 | Chromosome |
| <b>123</b> |          | PanR0805     |            | ATSJ00000000 | Chromosome |
| <b>124</b> |          | PanR1007     |            | ATSR00000000 | Chromosome |
| <b>125</b> |          | PanR0704     |            | ANNN00000000 | Chromosome |
| <b>126</b> |          | PanR0708     |            | ATSF00000000 | Chromosome |

|     |          |              |                              |              |                 |
|-----|----------|--------------|------------------------------|--------------|-----------------|
| 127 |          | PanR0703     |                              | ATSD00000000 | Chromosome      |
| 128 |          | PanR0611     |                              | ATSB00000000 | Chromosome      |
| 129 |          | F11          | Western Cape of South Africa | CP000717     | Complete Genome |
| 130 | LAM9     | MOS2         | Russia                       | SRX216914    | Reads           |
| 131 |          | MOS7         |                              | SRX216915    |                 |
| 132 |          | SP34         |                              | SRX216908    |                 |
| 133 |          | SP35         |                              | SRX216909    |                 |
| 134 |          | SP36         |                              | SRX216910    |                 |
| 135 |          | SP37         |                              | SRX216911    |                 |
| 136 |          | SP38         |                              | SRX216912    |                 |
| 137 |          | SP39         |                              | SRX216913    |                 |
| 138 |          |              |                              | CTRI-2       |                 |
| 139 | SMI-049  | S96-129      | Sweden                       | AEGB00000000 | Chromosome      |
| 140 |          | BTB05-559    |                              | AEGD00000000 | Chromosome      |
| 141 |          | BTB05-552    |                              | AEGC00000000 | Chromosome      |
| 142 | S        | SUMu002      | N/A                          | ADHR00000000 | Scaffold        |
| 143 |          | SUMu003      |                              | ADHS00000000 | Scaffold        |
| 144 |          | SUMu004      |                              | ADHT00000000 | Scaffold        |
| 145 |          | SUMu005      |                              | ADHU00000000 | Scaffold        |
| 146 |          | SUMu006      |                              | ADHV00000000 | Scaffold        |
| 147 |          | SUMu008      |                              | ADHX00000000 | Scaffold        |
| 148 |          | SUMu007      |                              | ADHW00000000 | Scaffold        |
| 149 |          | SUMu009      |                              | ADHY00000000 | Scaffold        |
| 150 |          |              |                              | GuangZ0019   | China           |
| 151 | X        | CDC1551      | USA                          | AE000516     | Complete Genome |
| 152 |          | CDC1551A     |                              | AELF00000000 | Scaffold        |
| 153 |          | PanR0316     | Panama                       | ATEI00000000 | Chromosome      |
| 154 | PanR0301 | ATET00000000 |                              | Chromosome   |                 |
| 155 | PanR0305 | ATER00000000 |                              | Chromosome   |                 |
| 156 | Ural     | MOS9         | Russia                       | SRX216916    | Reads           |
| 157 |          | SP24         |                              | SRX216901    |                 |
| 158 |          | SP25         |                              | SRX216902    |                 |

|            |         |          |          |                 |                 |
|------------|---------|----------|----------|-----------------|-----------------|
| <b>159</b> |         | SP28     |          | SRX216903       |                 |
| <b>160</b> |         | SP31     |          | SRX216905       |                 |
| <b>161</b> |         | SP32     |          | SRX216906       |                 |
| <b>162</b> |         | SP33     |          | SRX216907       |                 |
| <b>163</b> |         | OSDD493  | India    | AVQJ00000000    | Contig          |
| <b>164</b> | T       | PanR0309 | Panama   | ATEN00000000    | Chromosome      |
| <b>165</b> |         | PanR0208 |          | ATMO00000000    | Chromosome      |
| <b>166</b> |         | PanR0202 |          | ATAS00000000    | Chromosome      |
| <b>167</b> |         | PanR0908 |          | ATSP00000000    | Chromosome      |
| <b>168</b> |         | H37Rv    | N/A      | CP003248        | Complete Genome |
| <b>169</b> | H37Ra   | N/A      | CP000611 | Complete Genome |                 |
| <b>170</b> | Unknown | SUMu012  | N/A      | ADIB00000000    | Scaffold        |
| <b>171</b> |         | SUMu010  |          | ADHZ00000000    | Scaffold        |
| <b>172</b> |         | SUMu11   |          | ADIA00000000    | Scaffold        |
| <b>173</b> |         | SUMu01   |          | ADHQ00000000    | Scaffold        |
